# Supplementary material for: The ANDROMEDA prospective cohort study: predictive value of combined criteria to tailor breast cancer screening and new opportunities from circulating markers: study protocol
Source: Springer Nature journal article supplement (doi:10.1186/s12885-017-3784-5), 2017-11-22
Supplement: MOESM1 [file 15246730]

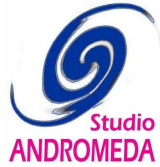

## SHORT RISK QUESTIONNAIRE

(to be filled on the tablet device)

### 1) GENERAL INFORMATION

1.1 Identification number

\_\_\_\_\_

1.2 Please insert the following general information:

Height in cm \_\_\_\_\_ Weight in kg \_\_\_\_\_

1.3 What is your study level?

(Select one option only)

- I have never studied
- Primary school license
- Secondary school license
- Professional school diploma (2/3 years course)
- High school diploma (4/5 years course)
- Degree (3 years course)
- Master degree (4/5 years course)
- PhD

### 2) PERSONAL HISTORY

2.1 How many among mother, daughters, and sisters had a breast cancer diagnosis?

- None
- One
- Two or more
- I don't know / I don't remember

2.2 Have you ever had a breast biopsy (including needle biopsy) in the past?

- None
- One
- Two or more
- I don't know / I don't remember

2.3 (If yes) How many biopsies have you undergone to?

- 1
- 2
- 3
- 4
- more than 4

### 3) HORMONAL AND REPRODUCTIVE HISTORY

3.1 At what age your menstrual cycle started?

- 11 years or less
- 12/13 years
- 14 years or more
- I don't know / I don't remember

3.2 Do you still have your menstrual cycle?

- Yes
- No

3.3 (*If you still have your menstrual cycle*) How many menstrual cycles have you had in the past 12 months?

- 1-3
- 4-5
- 6-9
- 10 or more
- I don't know / I don't remember

3.4 (*If you do not have your menstrual cycle any more*) At what age did you have your last menstrual cycle?

\_\_\_\_\_ (*Please, leave blank if you don't know or can't remember*)

3.5 How many children did you have? (born alive)

- I have no children
- 1
- 2
- 3
- more than 3

3.6 (*If you had children*) At what age did you have your first child? (born alive)

- 19 years or less
- 20-24 years
- 25-29 years
- 30 years or more

3.7 Are you currently under hormonal therapy?

- Yes
- No

#### 4) HABITS

4.1 When you were 30-39 years, which was your level of physical activity at work or at home (if housewife)?

- very heavy (*e.g., construction worker, athlete or dancer*)
- heavy (*e.g., farmer, workwoman*)
- medium (*e.g., waitress, nursery school teacher*)
- standing up (*e.g., shop assistant, teacher*)
- mainly sitting (*e.g., office worker, student*)

4.2 When you were 30-39 years, how many hours a week of physical activity did you practice in your free time?

- more than 7 hours/week
- 5-7 hours/week
- 2-4 hours/week
- less than 2 hours/week

4.3 Do you drink alcoholic drinks or did you drink them in the past?

- Yes (*also occasionally*)
- No (*I never drank them*)
- In the past (*now, I don't drink them*)

4.4 (*If you drank alcoholic drinks in the past but not anymore*) How long ago have you given up?

- less than 1 year
- more than 1 year
