# Supplementary material for: The ANDROMEDA prospective cohort study: predictive value of combined criteria to tailor breast cancer screening and new opportunities from circulating markers: study protocol
Source: Springer Nature journal article supplement (doi:10.1186/s12885-017-3784-5), 2017-11-22
Supplement: MOESM2 [file 15246730]

### Patient identification code

|  |  |  |  |  |  |  |  |  |  |  |  |  |
|--|--|--|--|--|--|--|--|--|--|--|--|--|
|  |  |  |  |  |  |  |  |  |  |  |  |  |
|--|--|--|--|--|--|--|--|--|--|--|--|--|

Center: \_\_\_\_\_

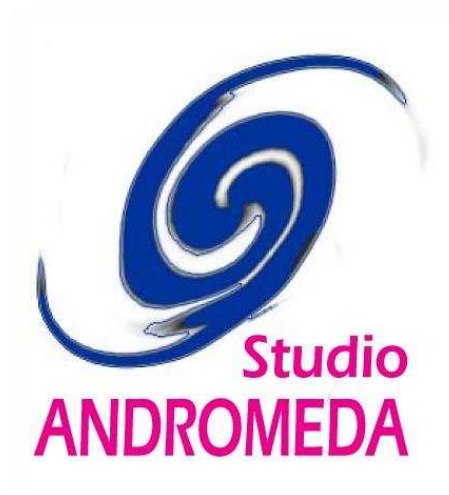

### QUESTIONNAIRE ON LIFE STYLE HABITS

This questionnaire can be:

- **filled in and delivered to the project staff at the screening center;**
- **filled in at home and sent to San Giovanni Hospital, Via Cavour 31, 10123 Turin, or delivered to the project staff at ground floor;**
- **filled in at home and returned at the time of the appointment for the blood sample**

If you have any questions about the study you can telephone on the free toll number **800.00.51.41**

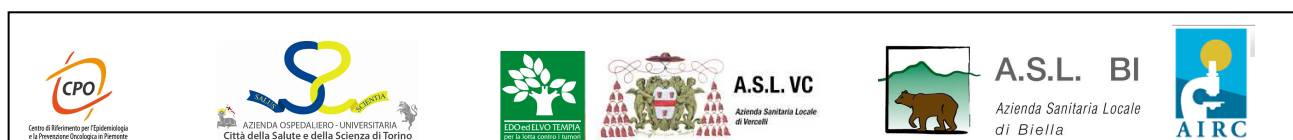

**Surname** \_\_\_\_\_

**Forename (s)** \_\_\_\_\_

**Place of birth** \_\_\_\_\_ **Province:** \_\_\_\_\_

**Date of birth** \_\_\_\_\_ / \_\_\_\_\_ / \_\_\_\_\_

**Mother place of birth** \_\_\_\_\_ **Province:** \_\_\_\_\_

**Father place of birth** \_\_\_\_\_ **Province:** \_\_\_\_\_

**Marital status** (please tackle the right answer)

|                          |                          |
|--------------------------|--------------------------|
| <input type="checkbox"/> | conjugated or cohabiting |
| <input type="checkbox"/> | unmarried                |
| <input type="checkbox"/> | widow                    |
| <input type="checkbox"/> | separated or divorced    |

**Date of compilation** \_\_\_\_\_ / \_\_\_\_\_ / \_\_\_\_\_

## Section 1 – PHYSICAL ACTIVITY

The questions of this questionnaire refer to activities carried out during the last year. Please answer to all the questions.

### JOB

#### 1-1) Do you have a paid job at present?

- YES, full time     YES, part time     NO

If YES, what is your job? \_\_\_\_\_

If no, NO you are currently:

- Retired            what job did you do before? \_\_\_\_\_
- Housewife
- Not occupied        what job did you do before? \_\_\_\_\_

#### 1-2) In this job or past job, which of the following best describe your physical activity? Please tick one only.

- SEDENTARY OCCUPATION** – You spent most of your time sitting (such as in an office)
- STANDING OCCUPATION** – You spent most of your time standing or walking. However, your work does not require intense physical effort (e.g. shop assistant, hairdresser, guard).
- MANUAL WORK** – This involves some physical effort including handling of heavy objects and use of tools (e.g. plumber, electrician, carpenter)
- HEAVY MANUAL WORK** – This involves very vigorous physical activity including handling very heavy objects (e.g. docker, miner, bricklayer, construction worker)

#### 1-3) Generally, how many hours a day do you spend for housekeeping?

- Less than 1 hour     1-2 hours     3-4 hours     5-6hours     7 hour or more

1-4) How many stairwells do you climb every day on average? Consider it at home and at work. (For example: Work or work on the 4th floor and I go twice = 8 levels of stairs)

- none             1 – 2             3 – 4             5 – 6             7 - 9
- 10 - 12             13 – 15             16 – 20             21 floors or more per day

## PHYSICAL ACTIVITY DURING YOUR FREE TIME (in any case not at work)

**In a typical week, during the last year, how many hours did you spend on each of the following activities?**

*Please, answer to all the questions, even if the answer is 'never'..*

### **1-5) Walking** (going to work, doing shopping, taking a walk)

#### **IN SUMMER**

- Never     Less then 1 hour per week     1-2 hours per week     3-4 hours per week  
 5-6 hours per week     7-8 hours per week     9-10 hours per week     11 hours or more per week

#### **IN WINTER**

- Never     Less then 1 hour per week     1-2 hours per week     3-4 hours per week  
 5-6 hours per week     7-8 hours per week     9-10 hours per week     11 hours or more per week

### **1-6) Cycling** (going to work, in your free time)

#### **IN SUMMER**

- Never     Less then 1 hour per week     1-2 hours per week     3-4 hours per week  
 5-6 hours per week     7-8 hours per week     9-10 hours per week     11 hours or more per week

#### **IN WINTER**

- Never     Less then 1 hour per week     1-2 hours per week     3-4 hours per week  
 5-6 hours per week     7-8 hours per week     9-10 hours per week     11 hours or more per week

### **1-7) Gardening / Do-it-yourself activities**

#### **IN SUMMER**

- Never     Less then 1 hour per week     1-2 hours per week     3-4 hours per week  
 5-6 hours per week     7-8 hours per week     9-10 hours per week     11 hours or more per week

#### **IN WINTER**

- Never     Less then 1 hour per week     1-2 hours per week     3-4 hours per week  
 5-6 hours per week     7-8 hours per week     9-10 hours per week     11 hours or more per week

**1-8) Sport** (including gym, dance, swimming, tennis, racing, hiking, cycling, mountain biking)

**IN SUMMER**

- Never     Less than 1 hour per week     1-2 hours per week     3-4 hours per week  
 5-6 hours per week     7-8 hours per week     9-10 hours per week     11 hours or more per week

**IN WINTER**

- Never     Less than 1 hour per week     1-2 hours per week     3-4 hours per week  
 5-6 hours per week     7-8 hours per week     9-10 hours per week     11 hours or more per week

**1-9) Do you practice any activities vigorous enough to cause sweating or a faster heartbeat?**

Yes                       NO

If yes, for how many hours each week?

- Never     Less than 1 hour per week     1-2 hours per week     3-4 hours per week  
 5-6 hours per week     7-8 hours per week     9-10 hours per week     11 hours or more per week

**1-10) In the last year, did you change the amount of time you spend on physical activity significantly?**

Yes                       NO

If yes, you have:

- reduced your time     increased your time

**If you have reduced or increased the time spend on physical activity, please specify the reason:**

health reasons (please specify) \_\_\_\_\_

other reasons (please specify) \_\_\_\_\_

## Section 2 – DIETARY HABITS

The following questions refer to your eating habits in the last year.

*In answering the questions, please think about all meals you eat in a day (breakfast, lunch, dinner and snacks)*

*Remember: answer to ALL the questions, even if the answer is NEVER, as in the following example:*

### 2-8) How many times did you eat red beef (including calf), sheep, pig, horse?

Never

Usually your dish was:

smaller
  like this
  like this
  like this
  larger

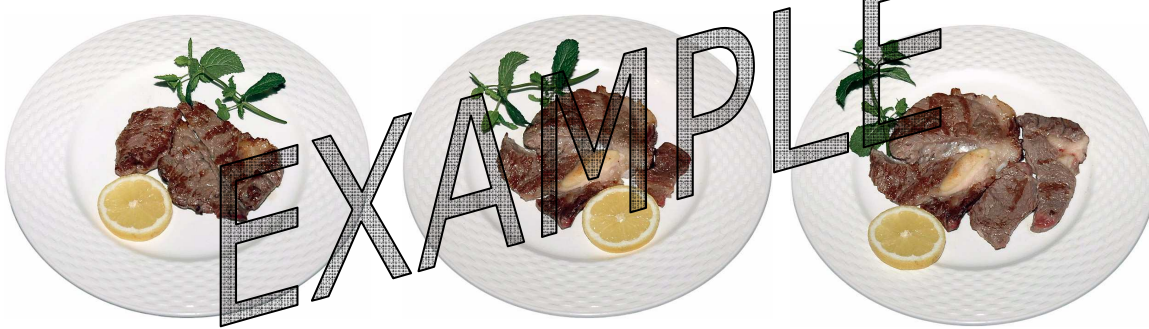

How was usually prepared the meat you ate?

|                                 | Very often | Often | Sometimes | Rarely   | Never    |
|---------------------------------|------------|-------|-----------|----------|----------|
| grilled, roasted, boiled, raw   | <b>X</b>   |       |           |          |          |
| stewed                          | <b>X</b>   |       |           |          |          |
| stuffed meat, meatballs, fried  |            |       |           |          | <b>X</b> |
| with oil, with butter, scallops |            |       |           | <b>X</b> |          |

The example shows that the consumption of red meat is three times a week and that the portion usually consumed is the same as the one reproduced in the first of the three photos.

**Please indicate the portion you eat in all answers. The only case that should not be mentioned is when the answer is NEVER.**

Concerning the preparation type, the example shows that it is eaten "very often" on the grill grid ... and stewed .... "never" fried ... "rarely" cooked with butter.

## FIRST COURSES

### 2-1) How many times did you eat pasta?

|                    |                   |                     |                    |                                |
|--------------------|-------------------|---------------------|--------------------|--------------------------------|
| Times per day_____ | Times per week___ | Times per month____ | Times per year____ | <input type="checkbox"/> Never |
|--------------------|-------------------|---------------------|--------------------|--------------------------------|

Usually your dish was:

smaller     
  like this     
  like this     
  like this     
  larger

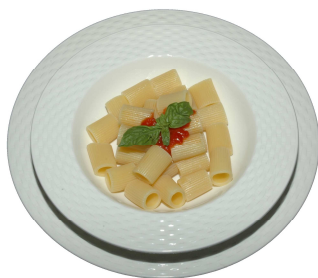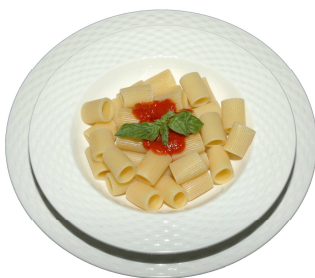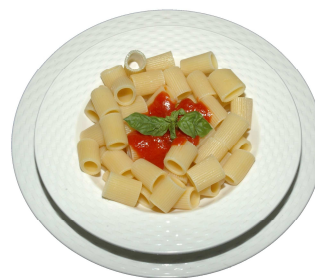

### How often did you eat these kinds of pasta?

|                                              | Very often | Often | Sometimes | Rarely | Never |
|----------------------------------------------|------------|-------|-----------|--------|-------|
| durum wheat pasta                            |            |       |           |        |       |
| whole wheat pasta                            |            |       |           |        |       |
| pasta made from other cereals (kamut, spelt) |            |       |           |        |       |
| egg pasta (noodles)                          |            |       |           |        |       |
| stuffed pasta                                |            |       |           |        |       |

### How was usually prepared the pasta you ate?

|                                                                  | Very often | Often | Sometimes | Rarely | Never |
|------------------------------------------------------------------|------------|-------|-----------|--------|-------|
| with oil or butter, only                                         |            |       |           |        |       |
| with tomato sauce                                                |            |       |           |        |       |
| with meat sauce (e.g. with sauerkraut, sausage)                  |            |       |           |        |       |
| with vegetables (e.g. broccoli, zucchini, eggplant, pesto sauce) |            |       |           |        |       |
| fish sauce (e.g. with tuna, salmon, seafood)                     |            |       |           |        |       |
| pasta salad                                                      |            |       |           |        |       |
| lasagna, cannelloni                                              |            |       |           |        |       |

### 2-2) How many times did you eat common white rice?

Never

Usually your dish was:

smaller
  like this
  like this
  like this
  larger

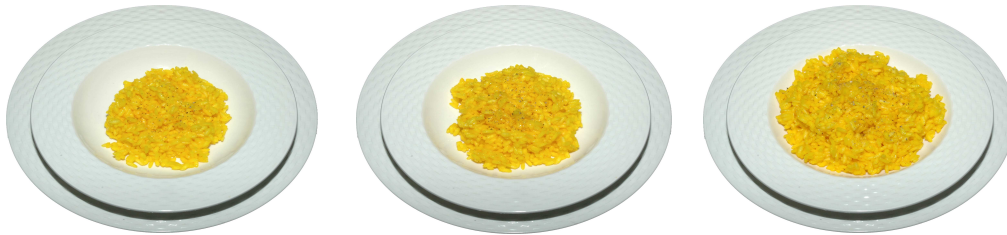

### How was usually prepared the rice you ate?

|                                                                  | Very often | Often | Sometimes | Rarely | Never |
|------------------------------------------------------------------|------------|-------|-----------|--------|-------|
| with oil or butter, only                                         |            |       |           |        |       |
| with tomato sauce                                                |            |       |           |        |       |
| with meat sauce (e.g. with sauerkraut, sausage)                  |            |       |           |        |       |
| with vegetables (e.g. broccoli, zucchini, eggplant, pesto sauce) |            |       |           |        |       |
| fish sauce (e.g. with tuna, salmon, seafood)                     |            |       |           |        |       |
| rice salad                                                       |            |       |           |        |       |

### 2-3) How many times did you eat whole grains (like wheat, spelt, barley, complete rice, buckwheat)?

Never

Usually your plate was:

smaller
  like this
  like this
  like this
  larger

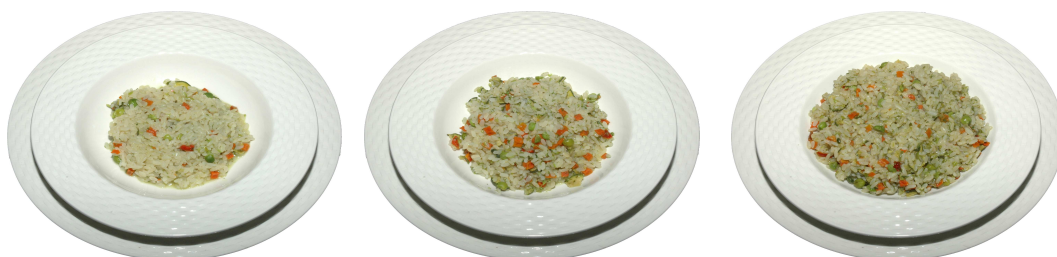

### How were usually prepared the cereals you ate?

|                                                                  | Very often | Often | Sometimes | Rarely | Never |
|------------------------------------------------------------------|------------|-------|-----------|--------|-------|
| with oil or butter, only                                         |            |       |           |        |       |
| with tomato sauce                                                |            |       |           |        |       |
| with meat sauce (e.g. with sauerkraut, sausage)                  |            |       |           |        |       |
| with vegetables (e.g. broccoli, zucchini, eggplant, pesto sauce) |            |       |           |        |       |
| fish sauce (e.g. with tuna, salmon, seafood)                     |            |       |           |        |       |
| cereal salad                                                     |            |       |           |        |       |



**2-4) How many times did you eat pizza?**

Please, consider pizza eaten as a meal, both at home or in a pizza restaurant.

Never

**2-5) How many times did you eat cornmeal mush?** Please, consider cornmeal mush eaten as a meal.

Never

Usually your dish was:

smaller
  like this
  like this
  like this
  larger

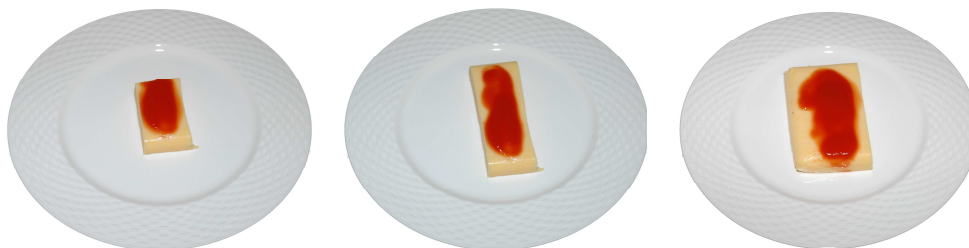

**2-6) How many times did you eat vegetable soup/legume soup?** With or without some pasta or rice.

Never

Usually your dish was:

smaller
  like this
  like this
  like this
  larger

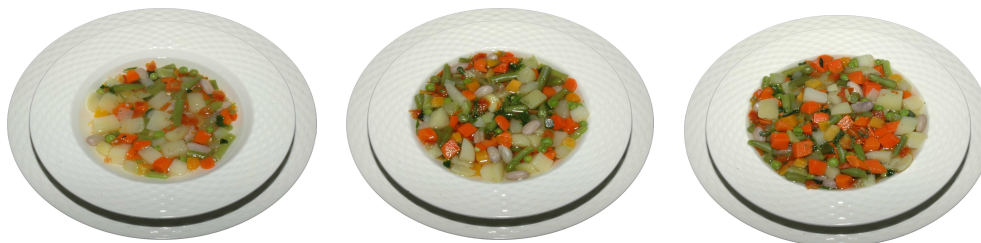

**How were usually prepared the soups you ate?**

|                                              | Very often | Often | Sometimes | Rarely | Never |
|----------------------------------------------|------------|-------|-----------|--------|-------|
| minestrone, creamy soups                     |            |       |           |        |       |
| with beans, chick peas, lentils, broad beans |            |       |           |        |       |
| consommé                                     |            |       |           |        |       |
| with pasta, rice or cereals                  |            |       |           |        |       |

## MEAT

### 2-7) How many times did you eat red beef (including calf), sheep, pig, horse?

Never

Usually, your dish was:

smaller
  like this
  like this
  like this
  larger

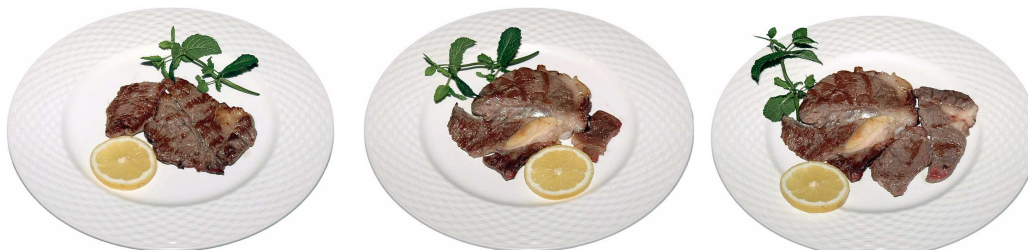

### How was usually prepared the red meat you ate?

|                                 | Very often | Often | Sometimes | Rarely | Never |
|---------------------------------|------------|-------|-----------|--------|-------|
| grilled, roasted, boiled, raw   |            |       |           |        |       |
| stewed                          |            |       |           |        |       |
| stuffed meat, meatballs, fried  |            |       |           |        |       |
| with oil, with butter, scallops |            |       |           |        |       |
| preserved meat (in jars)        |            |       |           |        |       |

### 2-8) How many times did you eat white meat, like chicken, rabbit, turkey?

Never

Usually your dish was:

smaller
  like this
  like this
  like this
  larger

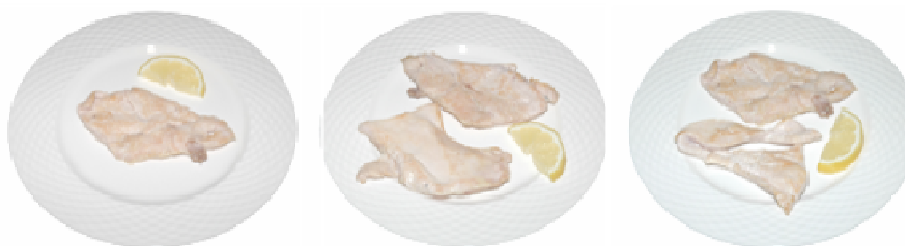

### How was usually prepared the white meat you ate?

|                                 | Very often | Often | Sometimes | Rarely | Never |
|---------------------------------|------------|-------|-----------|--------|-------|
| grilled, roasted, boiled, raw   |            |       |           |        |       |
| stewed                          |            |       |           |        |       |
| stuffed meat, meatballs, fried  |            |       |           |        |       |
| with oil, with butter, scallops |            |       |           |        |       |
| preserved meat (in jars)        |            |       |           |        |       |

## FISH

**2-9) How many times did you eat fish (e.g. trout, hake, sole, salmon, anchovies, mackerel)?** Consider both fresh and frozen fish.

|                    |                    |                     |                    |                                |
|--------------------|--------------------|---------------------|--------------------|--------------------------------|
| Times per day_____ | Times per week____ | Times per month____ | Times per year____ | <input type="checkbox"/> Never |
|--------------------|--------------------|---------------------|--------------------|--------------------------------|

Usually your dish was:

smaller     
  like this     
  like this     
  like this     
  larger

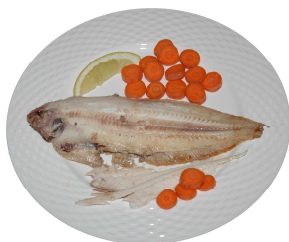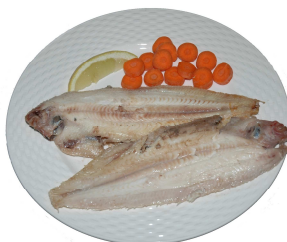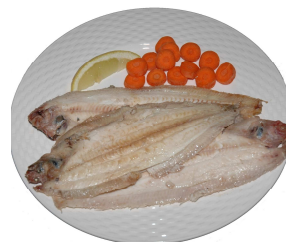

### How often did you eat fish?

|                                            | Very often | Often | Sometimes | Rarely | Never |
|--------------------------------------------|------------|-------|-----------|--------|-------|
| tuna, swordfish, shaggy, salmon, cod, hake |            |       |           |        |       |
| sole, sea bream, sea bass                  |            |       |           |        |       |
| mackerel, anchovies, palamites             |            |       |           |        |       |
| trout, pike                                |            |       |           |        |       |

### How was usually prepared the fish you ate?

|                                            | Very often | Often | Sometimes | Rarely | Never |
|--------------------------------------------|------------|-------|-----------|--------|-------|
| baked, grilled, irrigated, boiled, raw     |            |       |           |        |       |
| stewed                                     |            |       |           |        |       |
| fried, fishballs                           |            |       |           |        |       |
| with oil, with butter                      |            |       |           |        |       |
| canned fish or in jars (in oil or natural) |            |       |           |        |       |

**2-10) How many times did you eat seafood (e.g., shrimps, scampi, octopus, squid, mussels, clams)?** Consider both fresh and frozen ones.

Times per day\_\_\_\_\_

Times per week\_\_

Times per month\_\_\_\_

Times per year\_\_\_\_

Never

Usually your dish was:

smaller

like this

like this

like this

larger

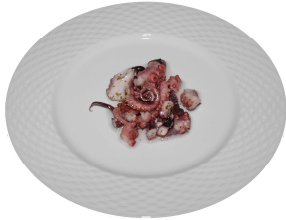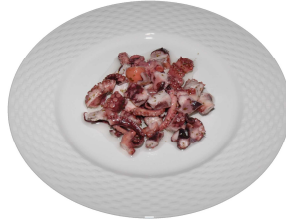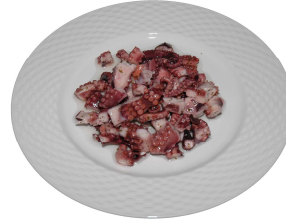

**How was usually prepared the seafood you ate?**

|                                            | Very often | Often | Sometimes | Rarely | Never |
|--------------------------------------------|------------|-------|-----------|--------|-------|
| baked, grilled, irrigated, boiled, raw     |            |       |           |        |       |
| stewed                                     |            |       |           |        |       |
| fried, fishballs                           |            |       |           |        |       |
| with oil, with butter                      |            |       |           |        |       |
| canned fish or in jars (in oil or natural) |            |       |           |        |       |

### COLD CUTS

In answering the questions, please also consider cold cuts contained in stuffed sandwiches, piadinas, and toasts.

#### 2-11) How many times did you eat cold cuts, like parma ham, cooked ham, bresaola, speck?

|                   |                  |                     |                    |                                |
|-------------------|------------------|---------------------|--------------------|--------------------------------|
| Times per day____ | Times per week__ | Times per month____ | Times per year____ | <input type="checkbox"/> Never |
|-------------------|------------------|---------------------|--------------------|--------------------------------|

Usually your dish was:

- smaller       like this       like this       like this       larger

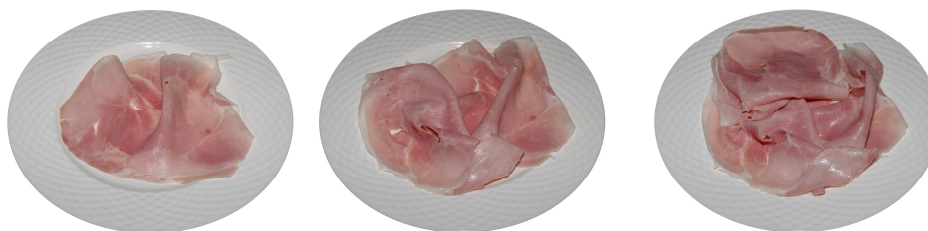

#### 2-12) How many times did you eat cold cuts, like salami, bologna, bacon, sausages, cotechino, würstel?

|                   |                  |                     |                    |                                |
|-------------------|------------------|---------------------|--------------------|--------------------------------|
| Times per day____ | Times per week__ | Times per month____ | Times per year____ | <input type="checkbox"/> Never |
|-------------------|------------------|---------------------|--------------------|--------------------------------|

Usually your dish was:

- smaller       like this       like this       like this       larger

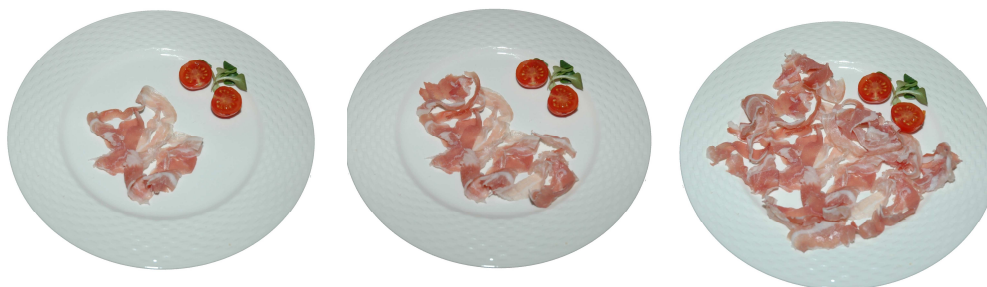

## CHEESE

In answering the questions, please also consider cheese contained in stuffed sandwiches, piadinas, and toasts.

### 2-13) How many times did you eat matured cheese, like fontina, toma, parmesan, provolone, emmenthal, pecorino, caciocavallo, gorgonzola?

Never

Usually your dish was:

smaller  like this  like this  like this  larger

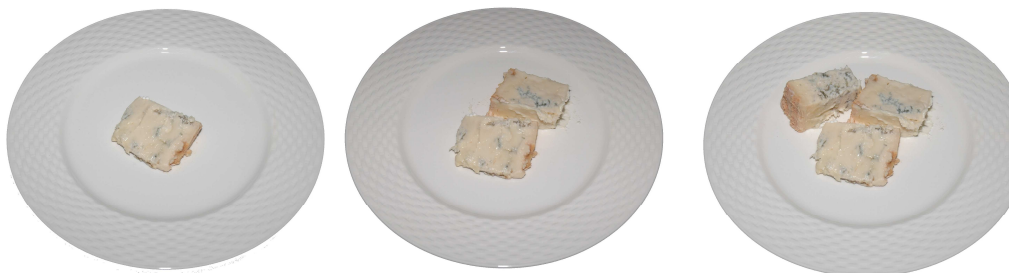

### 2-14) How many times did you eat fresh/spreadable cheese, like cottage cheese, mozzarella, stracchino, robiola?

Never

Usually your dish was:

smaller  like this  like this  like this  larger

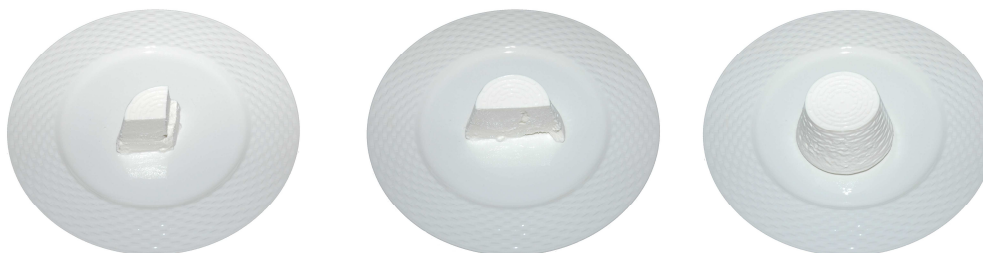

## EGGS

**2-15) How many eggs did you eat (boiled, fried, omelets)?**

|                   |                  |                     |                    |                                |
|-------------------|------------------|---------------------|--------------------|--------------------------------|
| Times per day____ | Times per week__ | Times per month____ | Times per year____ | <input type="checkbox"/> Never |
|-------------------|------------------|---------------------|--------------------|--------------------------------|

## BEANS AND VEGETABLE SUBSTANCES OF ANIMAL PROTEINS

**2-16) How many times did you eat legumes, such as beans, lentils, chickpeas, peas, soya beans (fresh, dried, frozen or canned)?** *In answering the question, please do not consider legumes eaten in first courses and soups.*

|                   |                  |                     |                    |                                |
|-------------------|------------------|---------------------|--------------------|--------------------------------|
| Times per day____ | Times per week__ | Times per month____ | Times per year____ | <input type="checkbox"/> Never |
|-------------------|------------------|---------------------|--------------------|--------------------------------|

Usually your dish was:

smaller     
  like this     
  like this     
  like this     
  larger

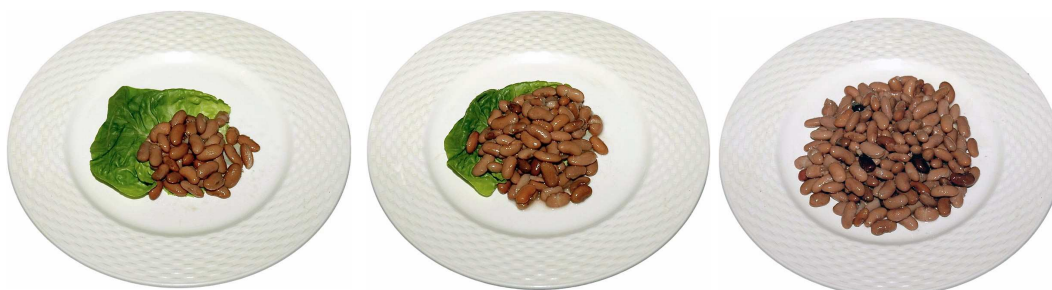

**How were usually prepared the beans you ate?**

|                    | Very often | Often | Sometimes | Rarely | Never |
|--------------------|------------|-------|-----------|--------|-------|
| in cans or in jars |            |       |           |        |       |
| boiled or steamed  |            |       |           |        |       |
| stewed             |            |       |           |        |       |
| bean balls         |            |       |           |        |       |
| in puree           |            |       |           |        |       |

**2-17) How many times did you eat foods like tofu, miso, tempeh, seitan?**

|                   |                  |                     |                    |                                |
|-------------------|------------------|---------------------|--------------------|--------------------------------|
| Times per day____ | Times per week__ | Times per month____ | Times per year____ | <input type="checkbox"/> Never |
|-------------------|------------------|---------------------|--------------------|--------------------------------|



## VEGETABLES

**2-18) How many times did you eat cooked vegetables (e.g., cabbage, cauliflower, zucchini, carrots, eggplants, spinaches, leeks, beets)?**

Never

Usually your dish was:

smaller
  like this
  like this
  like this
  larger

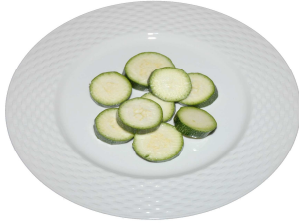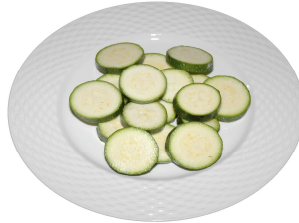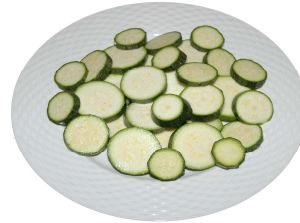

**How were usually prepared the vegetables you ate?**

|                   | Very often | Often | Sometimes | Rarely | Never |
|-------------------|------------|-------|-----------|--------|-------|
| steamed or boiled |            |       |           |        |       |
| stewed            |            |       |           |        |       |
| dumplings         |            |       |           |        |       |
| grilled or baked  |            |       |           |        |       |
| fried             |            |       |           |        |       |

**2-19) How many times did you eat raw vegetables (e.g., carrots, tomatoes, artichokes, fennel, cabbage)?**

Never

Usually, your dish was:

smaller
  like this
  like this
  like this
  larger

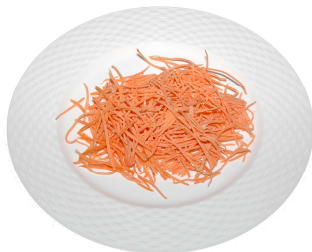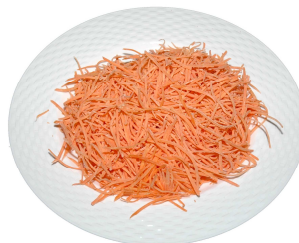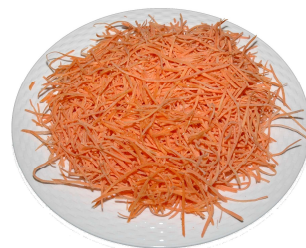



**2-20) How many times did you eat raw leafy vegetables (e.g., lettuce, valerian, radicchio, endive)?**

Never

Usually your dish was:

smaller
  like this
  like this
  like this
  larger

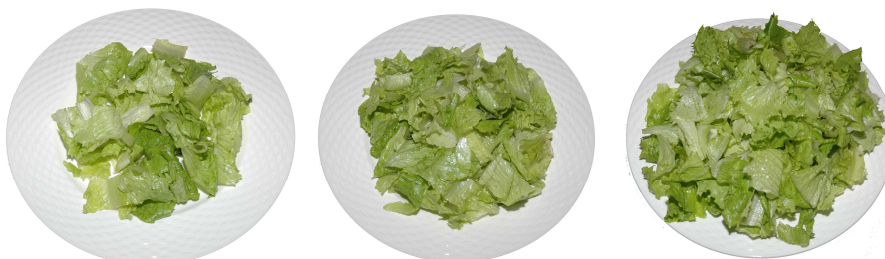

**2-21) How many times did you eat potatoes?**

Never

Usually your dish was:

smaller
  like this
  like this
  like this
  larger

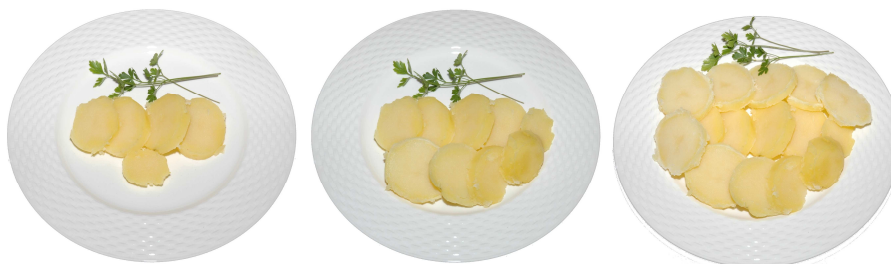

**How were usually prepared the potatoes you ate?**

|                                        | Very often | Often | Sometimes | Rarely | Never |
|----------------------------------------|------------|-------|-----------|--------|-------|
| boiled                                 |            |       |           |        |       |
| stewed                                 |            |       |           |        |       |
| baked                                  |            |       |           |        |       |
| mashed                                 |            |       |           |        |       |
| French fries, chips, potato croquettes |            |       |           |        |       |

## FRUITS

**2-22) How many fresh fruits portions did you eat?** (a portion corresponds to an apple or a pear or a cup of strawberries or three tangerines or two kiwis or three apricots)

Never

**Which fruits did you eat?**

|                                                | Very often | Often | Sometimes | Rarely | Never |
|------------------------------------------------|------------|-------|-----------|--------|-------|
| apples, pears                                  |            |       |           |        |       |
| apricots, peaches                              |            |       |           |        |       |
| oranges (also orange juice), tangerines, kiwis |            |       |           |        |       |
| grapes, figs, bananas                          |            |       |           |        |       |
| melon, watermelon                              |            |       |           |        |       |
| raspberries, blueberries, strawberries         |            |       |           |        |       |
| cherries, plums                                |            |       |           |        |       |
| others (specify)                               |            |       |           |        |       |

**2-23) How often did you eat fruit salads or dried fruit (e.g., apricots, plums)?**

Never

**2-24) How many times did you eat nuts (e.g., walnuts, hazelnuts, peanuts, almonds)?** Please, also consider nuts used in cakes.

Never

Usually your portion was:

smaller
  like this
  like this
  like this
  larger

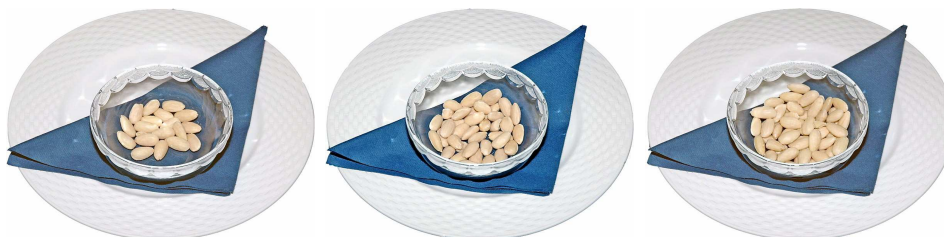

**2-25) How many times did you eat seeds (e.g., flax, pumpkin, sunflower, sesame, etc.)?** Please, also consider seeds added to bread, salads or consumed as snacks.

Never

Usually, how many spoonfuls of seeds did you eat?

less than 1
  1 or 2
  3 or 4
  more than 4

## SEASONINGS

**2-26) What kind of fats did you use for:**

(Mark an X below the seasoning used most frequently)

|                             | extra virgin olive oil | olive oil | seed oil (e.g., peanuts, sunflower) | margarine and vegetable cream | cream | butter |
|-----------------------------|------------------------|-----------|-------------------------------------|-------------------------------|-------|--------|
| preparing sauces            |                        |           |                                     |                               |       |        |
| cooking meat or fish        |                        |           |                                     |                               |       |        |
| frying                      |                        |           |                                     |                               |       |        |
| flavoring raw vegetables    |                        |           |                                     |                               |       |        |
| flavoring cooked vegetables |                        |           |                                     |                               |       |        |

**2-27) How often did you use spices (e.g., turmeric, pepper, chili pepper, curry)?**

very often    o     often    o     sometimes    o     rarely    o     never

**2-28) When you ate outside, did you usually add salt to the various dishes?**

very often    o     often    o     sometimes    o     rarely    o     never

## BREAD, CRACKERS, BREADSTICKS

In answering the questions, please think about breakfast and other meals, and outside meals.

**2-29) How many portions of bread or similar (crackers, breadsticks, biscuits) prepared with white flour did you eat? (a portion is equal to a slice of white bread or a small sandwich or a cracker package or 3-4 breadsticks).**

|                           |                       |                            |                       |                             |                       |                            |                       |                                |
|---------------------------|-----------------------|----------------------------|-----------------------|-----------------------------|-----------------------|----------------------------|-----------------------|--------------------------------|
| portions per day<br>_____ | <input type="radio"/> | portions per week<br>_____ | <input type="radio"/> | portions per month<br>_____ | <input type="radio"/> | portions per year<br>_____ | <input type="radio"/> | never <input type="checkbox"/> |
|---------------------------|-----------------------|----------------------------|-----------------------|-----------------------------|-----------------------|----------------------------|-----------------------|--------------------------------|

**2-30) How many portions of bread or similar (crackers, breadsticks, biscuits) prepared with COMPLETE flour or whole grains did you eat? (a portion is equivalent to a slice of whole wheat bread or a small sandwich or a cracker package or 3-4 breadsticks).**

|                           |                       |                            |                       |                             |                       |                            |                       |                                |
|---------------------------|-----------------------|----------------------------|-----------------------|-----------------------------|-----------------------|----------------------------|-----------------------|--------------------------------|
| portions per day<br>_____ | <input type="radio"/> | portions per week<br>_____ | <input type="radio"/> | portions per month<br>_____ | <input type="radio"/> | portions per year<br>_____ | <input type="radio"/> | never <input type="checkbox"/> |
|---------------------------|-----------------------|----------------------------|-----------------------|-----------------------------|-----------------------|----------------------------|-----------------------|--------------------------------|

**2-31) How many portions of bread with added seasonings (such as pizza, focaccia, bread with oil) did you eat?**

|                           |                       |                            |                       |                             |                       |                            |                       |                                |
|---------------------------|-----------------------|----------------------------|-----------------------|-----------------------------|-----------------------|----------------------------|-----------------------|--------------------------------|
| portions per day<br>_____ | <input type="radio"/> | portions per week<br>_____ | <input type="radio"/> | portions per month<br>_____ | <input type="radio"/> | portions per year<br>_____ | <input type="radio"/> | never <input type="checkbox"/> |
|---------------------------|-----------------------|----------------------------|-----------------------|-----------------------------|-----------------------|----------------------------|-----------------------|--------------------------------|

**2-32) How many times did you eat savory snacks (e.g., croutons, crisps)?**

|                                     |                       |                                |                       |                                    |                       |                                 |                       |                                |
|-------------------------------------|-----------------------|--------------------------------|-----------------------|------------------------------------|-----------------------|---------------------------------|-----------------------|--------------------------------|
| very often <input type="checkbox"/> | <input type="radio"/> | often <input type="checkbox"/> | <input type="radio"/> | sometimes <input type="checkbox"/> | <input type="radio"/> | rarely <input type="checkbox"/> | <input type="radio"/> | never <input type="checkbox"/> |
|-------------------------------------|-----------------------|--------------------------------|-----------------------|------------------------------------|-----------------------|---------------------------------|-----------------------|--------------------------------|

## WINE, BEER, ALCOHOL, DRINKS

### 2-33) How many glasses of wine did you drink?

o 
  o 
  o 
  o 
  none

### Which wine did you drink?

|                | Very often | Often | Sometimes | Rarely | Never |
|----------------|------------|-------|-----------|--------|-------|
| white wine     |            |       |           |        |       |
| red wine       |            |       |           |        |       |
| rosé wine      |            |       |           |        |       |
| sparkling wine |            |       |           |        |       |

### 2-34) How many cans or bottles (33 cl) of beer did you drink?

o 
  o 
  o 
  o 
  none

### 2-35) How many shots of spirits, bitter, liqueur (e.g., whiskey, vodka, brandy, rum, grappa) did you drink?

o 
  o 
  o 
  o 
  none

### 2-36) How many glasses or cans of soft drinks (e.g., fruit juices, orange soda, coke) did you drink?

o 
  o 
  o 
  o 
  none

## COFFEE, MILK, YOGURT, HERBAL TEA

In answering the questions, please think about breakfast and other meals, and outside meals.

### 2-37) How many cups of coffee (even decaffeinated) did you drink?

o 
  o 
  o 
  o 
 none

### 2-38) How many cups of cappuccino, coffee with milk, stained milk did you drink?

o 
  o 
  o 
  o 
 none

### 2-39) How many glasses of milk or natural yogurt (whole fat, half fat or skimmed) did you drink? (one cup matches two glasses)

o 
  o 
  o 
  o 
 none

### 2-40) How many glasses of sweetened milk or sweetened/fruit yogurt (whole fat, half fat or skimmed) did you drink? (one cup matches two glasses)

o 
  o 
  o 
  o 
 none

### 2-41) How many glasses of milk and/or vegetable yogurt (e.g., soya, oats, rice) did you drink? (one cup matches two glasses)

o 
  o 
  o 
  o 
 none

### 2-42) How many cups of tea, herbal tea or barley coffee did you drink?

o 
  o 
  o 
  o 
 none

### Mostly what kind of tea or similar did you drink?

|                     | Very often | often | sometimes | rarely | never |
|---------------------|------------|-------|-----------|--------|-------|
| black or common tea |            |       |           |        |       |
| green tea           |            |       |           |        |       |
| red tea             |            |       |           |        |       |
| detained tea        |            |       |           |        |       |
| herbal tea          |            |       |           |        |       |
| barley coffee       |            |       |           |        |       |

### 2-43) Normally, how many sugars (white or brown) or honeycombs did you put in the following foods? (1 sachet = 2 teaspoons) (if you do not use sugar, please indicate 0)

|                         | N |
|-------------------------|---|
| glass of milk           |   |
| glass of vegetable milk |   |
| jar of yogurt           |   |

|                                         | N |
|-----------------------------------------|---|
| cup of coffee                           |   |
| cup of tea, herbal tea or barley coffee |   |
| cup of cappuccino, coffee with milk     |   |

## SWEETS

In answering the questions, please think about breakfast and other meals, and outside meals.

### 2-44) How many breakfast biscuits did you eat?

o 
  o 
  o 
  o 
  none

### 2-45) How many brioche or croissants did you eat?

o 
  o 
  o 
  o 
  none

### 2-46) How many cakes or pastries did you eat?

o 
  o 
  o 
  o 
  none

### Usually, what kind of sweets were they?

|                                       | Very often | often | sometimes | rarely | Never |
|---------------------------------------|------------|-------|-----------|--------|-------|
| cake stuffed with chocolate or creams |            |       |           |        |       |
| stuffed cake (daisy, tart)            |            |       |           |        |       |
| pudding, tiramisu                     |            |       |           |        |       |
| cookies                               |            |       |           |        |       |
| brioche                               |            |       |           |        |       |
| pastries (cream puff, cannoli)        |            |       |           |        |       |

### 2-47) How many portions of corn-flakes, muesli, oatmeal did you eat?

o 
  o 
  o 
  o 
  none

### 2-48) How many portions of chocolate (all kinds, including spreadable creams) of about 10 grams did you eat?

o 
  o 
  o 
  o 
  none

### 2-49) How many candies or spoonful of jam or honey did you eat?

o 
  o 
  o 
  o 
  none

### 2-50) How many ice creams did you eat (all kinds)?

o 
  o 
  o 
  o 
  none

**2-51) Is there some food or some dish did you eat at least once a month and that was not included in this questionnaire?**

Yes

NO

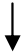

**If YES, please briefly describe:**

---

---

---

---

**2-52) Did you change your eating habits significantly in the last year?**

Yes

NO

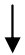

If YES, for which reason?

**to lose weight**

**health reasons** *(please, specify)* \_\_\_\_\_

**other** *(please, specify)* \_\_\_\_\_



### Section 3 – SMOKING HABITS

#### 3-1) Do you currently smoke?

YES

OCCASIONALLY

NO

If YES:

How many cigarettes (cigars, pipe) do you smoke in a day? \_\_\_\_\_

How old were you when you started smoking? \_\_\_\_\_

If OCCASIONALLY:

How many cigarettes (cigars, pipe) do you smoke in a week? \_\_\_\_\_ or in a month? \_\_\_\_\_

How old were you when you started smoking? \_\_\_\_\_

If NO:

I never smoked.

I smoked in the past, now I stopped

How many cigarettes (cigar, pipe) did you smoke every day? \_\_\_\_\_

At what age did you start smoking? \_\_\_\_\_

At what age did you stop smoking? \_\_\_\_\_

## Section 4 – GENERAL HEALTH

### 4-1) Did a medical doctor ever diagnosed one or more of the following conditions or diseases? (please answer any questions)

- |                       |                              |                             |                    |  | Pharmacological therapy      |                             |
|-----------------------|------------------------------|-----------------------------|--------------------|--|------------------------------|-----------------------------|
| - High blood pressure | <input type="checkbox"/> YES | <input type="checkbox"/> NO | at what age? _____ |  | <input type="checkbox"/> YES | <input type="checkbox"/> NO |
| - High cholesterol    | <input type="checkbox"/> YES | <input type="checkbox"/> NO | at what age? _____ |  | <input type="checkbox"/> YES | <input type="checkbox"/> NO |
| - High triglycerides  | <input type="checkbox"/> YES | <input type="checkbox"/> NO | at what age? _____ |  | <input type="checkbox"/> YES | <input type="checkbox"/> NO |
| - Diabetes            | <input type="checkbox"/> YES | <input type="checkbox"/> NO | at what age? _____ |  | <input type="checkbox"/> YES | <input type="checkbox"/> NO |
| - Malignant cancer    | <input type="checkbox"/> YES | <input type="checkbox"/> NO | at what age? _____ |  | <input type="checkbox"/> YES | <input type="checkbox"/> NO |
- If yes, where? \_\_\_\_\_

### 4-2) In addition to any previous diseases, should you regularly use drugs prescribed by a medical doctor? (excluding contraceptives)

- YES     NO

If YES, for which disease? \_\_\_\_\_

\_\_\_\_\_

### 4-3) Did you use oral contraceptives?

- YES     NO

If YES, at what age did you start using them? \_\_\_\_\_

How old were you when did you stop using them? \_\_\_\_\_  
(if you already stopped)

Summing up all time periods, for how long did you take them?

- |                                            |                                           |                                           |                                  |
|--------------------------------------------|-------------------------------------------|-------------------------------------------|----------------------------------|
| <input type="checkbox"/> less than 1 month | <input type="checkbox"/> less then 1 year | <input type="checkbox"/> 2 years          | <input type="checkbox"/> 3 years |
| <input type="checkbox"/> 4 years           | <input type="checkbox"/> 5 years          | <input type="checkbox"/> 6 years          | <input type="checkbox"/> 7 years |
| <input type="checkbox"/> 8 years           | <input type="checkbox"/> 9 years          | <input type="checkbox"/> 10 years or more |                                  |

**4-4) Are you currently in menopause? (absence of regular period for at least 6 months)**

YES     NO

If YES, at what age did you have your last menstrual period? \_\_\_\_\_

**4-5) If YES, did you take or are you currently taking hormone replacement therapies to relieve menopause disorders?**

YES     NO

If YES, at what age did you start using them? \_\_\_\_\_

Summing up all time periods, for how long did you take them?

- |                                            |                                           |                                           |                                  |
|--------------------------------------------|-------------------------------------------|-------------------------------------------|----------------------------------|
| <input type="checkbox"/> less than 1 month | <input type="checkbox"/> less than 1 year | <input type="checkbox"/> 2 years          | <input type="checkbox"/> 3 years |
| <input type="checkbox"/> 4 years           | <input type="checkbox"/> 5 years          | <input type="checkbox"/> 6 years          | <input type="checkbox"/> 7 years |
| <input type="checkbox"/> 8 years           | <input type="checkbox"/> 9 years          | <input type="checkbox"/> 10 years or more |                                  |

**4-6) We also would like to ask you now some more detailed information on your reproductive history.**

Did you have pregnancies?

YES     NO

If YES,

How many children did you have? \_\_\_\_\_

How many live-born children did you have? \_\_\_\_\_

Did you have spontaneous abortions or voluntary interruptions?

YES     NO

Did you breastfeed?

YES     NO

Please indicate the number of months of breastfeeding for each child:

1st child \_\_\_\_\_    2nd child \_\_\_\_\_    3rd child \_\_\_\_\_    4th child \_\_\_\_\_

## Section 5 – PSYCHOLOGICAL DISTRESS

What do you generally do when you experience adverse events or stressful situations? Please answer by marking an X on the correspondent answer.

**Legend:**

- 1** = I haven't been doing this at all.  
**2** = I've been doing this a little bit  
**3** = I've been doing this a medium amount  
**4** = I've been doing this a lot.

|              |                                                                                                                                     |   |   |   |   |
|--------------|-------------------------------------------------------------------------------------------------------------------------------------|---|---|---|---|
| <b>5-1)</b>  | I've been turning to work or other activities to take my mind off things.                                                           | 1 | 2 | 3 | 4 |
| <b>5-2)</b>  | I've been concentrating my efforts on doing something about the situation I'm in.                                                   | 1 | 2 | 3 | 4 |
| <b>5-3)</b>  | I've been saying to myself "this isn't real."                                                                                       | 1 | 2 | 3 | 4 |
| <b>5-4)</b>  | I've been using alcohol or other drugs to make myself feel better.                                                                  | 1 | 2 | 3 | 4 |
| <b>5-5)</b>  | I've been getting emotional support from others.                                                                                    | 1 | 2 | 3 | 4 |
| <b>5-6)</b>  | I've been giving up trying to deal with it.                                                                                         | 1 | 2 | 3 | 4 |
| <b>5-7)</b>  | I've been taking action to try to make the situation better.                                                                        | 1 | 2 | 3 | 4 |
| <b>5-8)</b>  | I've been refusing to believe that it has happened.                                                                                 | 1 | 2 | 3 | 4 |
| <b>5-9)</b>  | I've been saying things to let my unpleasant feelings escape.                                                                       | 1 | 2 | 3 | 4 |
| <b>5-10)</b> | I've been getting help and advice from other people.                                                                                | 1 | 2 | 3 | 4 |
| <b>5-11)</b> | I've been using alcohol or other drugs to help me get through it.                                                                   | 1 | 2 | 3 | 4 |
| <b>5-12)</b> | I've been trying to see it in a different light, to make it seem more positive.                                                     | 1 | 2 | 3 | 4 |
| <b>5-13)</b> | I've been criticizing myself.                                                                                                       | 1 | 2 | 3 | 4 |
| <b>5-14)</b> | I've been trying to come up with a strategy about what to do.                                                                       | 1 | 2 | 3 | 4 |
| <b>5-15)</b> | I've been getting comfort and understanding from someone.                                                                           | 1 | 2 | 3 | 4 |
| <b>5-16)</b> | I've been giving up the attempt to cope                                                                                             | 1 | 2 | 3 | 4 |
| <b>5-17)</b> | I've been looking for something good in what is happening.                                                                          | 1 | 2 | 3 | 4 |
| <b>5-18)</b> | I've been making jokes about it.                                                                                                    | 1 | 2 | 3 | 4 |
| <b>5-19)</b> | I've been doing something to think about it less, such as going to movies, watching TV, reading, daydreaming, sleeping, or shopping | 1 | 2 | 3 | 4 |
| <b>5-20)</b> | I've been accepting the reality of the fact that it has happened                                                                    | 1 | 2 | 3 | 4 |
| <b>5-21)</b> | I've been expressing my negative feelings                                                                                           | 1 | 2 | 3 | 4 |
| <b>5-22)</b> | I've been trying to find comfort in my religion or spiritual beliefs.                                                               | 1 | 2 | 3 | 4 |
| <b>5-23)</b> | I've been trying to get advice or help from other people about what to do.                                                          | 1 | 2 | 3 | 4 |
| <b>5-24)</b> | I've been learning to live with it.                                                                                                 | 1 | 2 | 3 | 4 |
| <b>5-25)</b> | I've been thinking hard about what steps to take.                                                                                   | 1 | 2 | 3 | 4 |
| <b>5-26)</b> | I've been blaming myself for things that happened.                                                                                  | 1 | 2 | 3 | 4 |
| <b>5-27)</b> | I've been praying or meditating.                                                                                                    | 1 | 2 | 3 | 4 |
| <b>5-28)</b> | I've been making fun of the situation                                                                                               | 1 | 2 | 3 | 4 |

**5-29) Do you think you (or persons around you) had traumatic experiences (e.g. grief, separation/divorce, work problems, health problems or people around you, etc.)?**

YES     NO

If YES,

In which year did you have the last traumatic experience? \_\_\_\_\_

In which year did you have the penultimate traumatic experience? \_\_\_\_\_

**Please, check having answering all questions!**

**Thanks for your collaboration!!!**

The photo of foods were available by courtesy of Me.Te.Da. Srl.

Section 1 (physical activity) and section 2 (dietary habits) were modified from the EPIC (The European Prospective Investigation into Cancer and Nutrition) study questionnaires (<http://epic.iarc.fr/>).

Section 5 (psychological distresses) was taken from the Brief COPE questionnaire (<http://www.psy.miami.edu/faculty/ccarver/sclBrCOPE.html> ).
